# Supplementary material for: Reinforced macromolecular micelle-crosslinked hyaluronate gels induced by water/DMSO binary solvent
Source: Royal Society of Chemistry journal article supplement (doi:10.1039/d0sm01099e), 2020-01-01
Supplement: d0sm01099e1.pdf [file d0sm01099e1.pdf]

### Supplementary information

## **Reinforced Macromolecular Micelle-crosslinked Hyaluronate Gels Induced by Water/DMSO Binary Solvent**

Hua Zhang <sup>a, b</sup>, Penggang Ren <sup>a\*</sup>, Hua Wei <sup>b</sup>, Sami Halila <sup>c</sup>, Amarachi Rosemary Osi <sup>b</sup>,

Yang Zhou <sup>b\*</sup>, Zhong Dai <sup>a</sup>, Rong Wang <sup>b</sup>, Jing Chen <sup>b\*</sup>

- a. School of Materials Science and Engineering, Xi'an University of Technology, Xi'an 710048, China.
- b. Zhejiang Engineering Research Center for Biomedical Materials, Cixi Institute of Biomedical Engineering, Ningbo Institute of Materials Technology and Engineering, Chinese Academy of Sciences, Ningbo 315300, China.
- c. Université Grenoble Alpes, Centre de Recherches sur les Macromolécules Végétales (CERMAV, UPR-CNRS 5301), F-38000 Grenoble, France.

Corresponding author:

E-mail: [rengpg@126.com](mailto:rengpg@126.com) (P. G. Ren); [zhouyang876@nimte.ac.cn](mailto:zhouyang876@nimte.ac.cn) (Y. Zhou);

[jing.chen@nimte.ac.cn](mailto:jing.chen@nimte.ac.cn) (J. Chen).

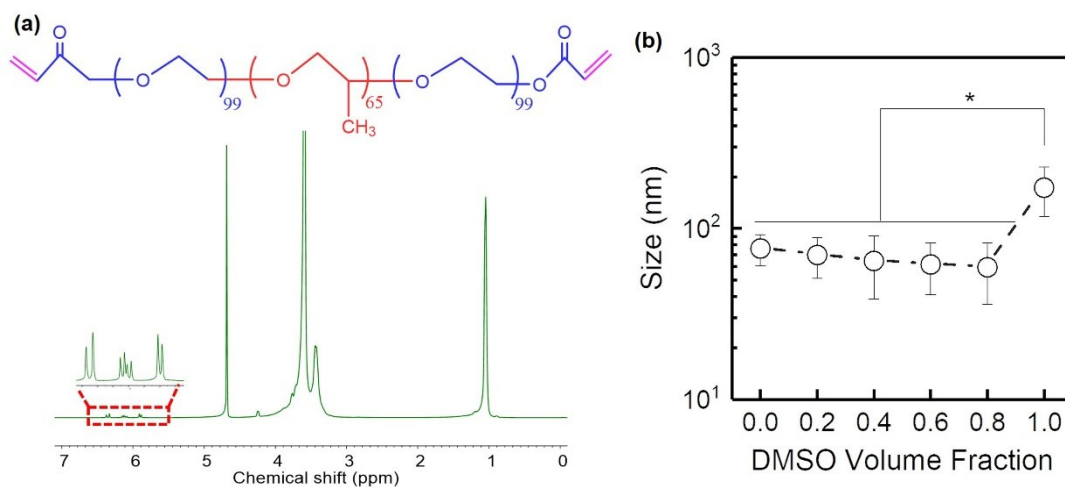

Figure S1. The (a) <sup>1</sup>H NMR spectrum of F127DA. (b) The nano-sizes of F127DA micelles in DMSO/H<sub>2</sub>O binary solvent system with different DMSO volume fractions from DLS measurements.

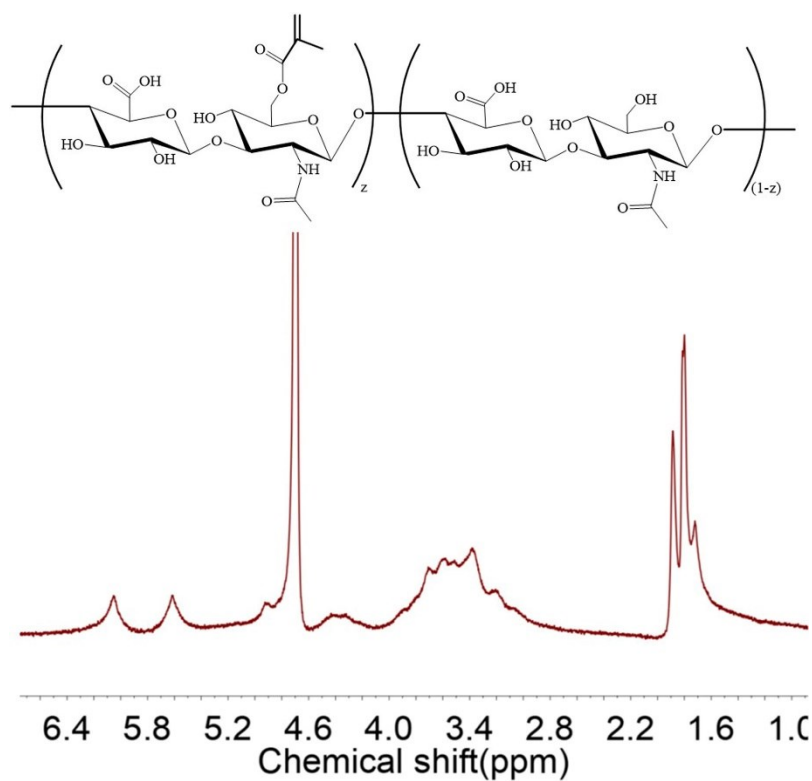

Figure S2. The <sup>1</sup>H NMR spectrum of methacrylate hyaluronic acid (MeHA)

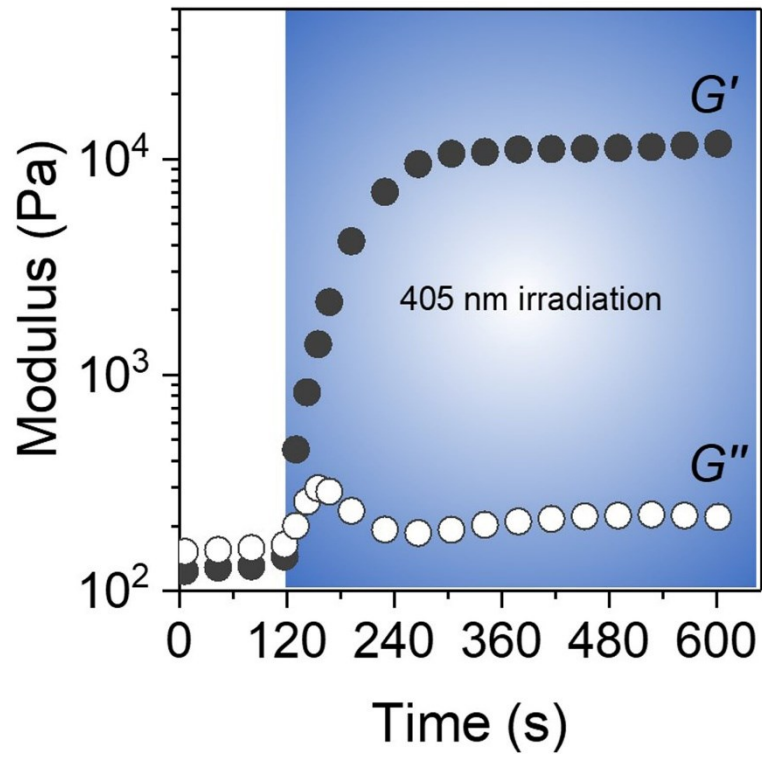

Figure S3. *In-situ* gelation analysis by the rheology detecting with 405nm blue-light exposure.
